# Supplementary material for: LRRC8A is essential for hypotonicity-, but not for DAMP-induced NLRP3 inflammasome activation
Source: eLife. 2020 Nov 20;9:e59704. doi: 10.7554/eLife.59704 (PMC7679132; doi:10.7554/eLife.59704)
Supplement: Figure 2—source data 1. [file elife-59704-fig2-data1.xlsx]

## Sheet: Fig 2A
	Time (s)	Isotonic												Hypotonic												Hypo DCPIB
	0.4408	1.06585	0.967309	0.935978	0.994185	1.10088	0.970733	1.00423	1.07224	1.00315	0.986857	1.07689	0.921636	0.968717	0.992238	0.942263	0.863188	0.964172	0.850746	0.927741	0.989808	0.872469	0.971422	1.02424	0.910461	1.07214	0.964245	1.05449	1.05939	1.03494	0.933811	1.016	0.97234	* = data excluded due to injection artefact
	2.4322	0.992469	0.972857	1.01543	0.928255	0.962397	1.06123	1.00203	0.967469	1.01065	0.99702	1.01133	0.970474	0.947254	1.01506	0.865141	0.890415	0.95228	0.922976	0.896378	0.968663	0.956968	1.01347	1.08787	0.967021	0.924491	1.022	0.957995	0.995134	1.01714	1.03364	0.986589	1.0518
	4.4336	1.02557	1.01036	1.02243	0.960223	0.90465	0.911718	1.01089	0.990915	0.992872	1.02365	1.04072	0.96688	0.924605	0.963934	0.919889	0.909231	0.935339	1.01077	0.946775	0.944323	0.920391	0.995587	1.01673	0.903782	1.01905	1.00974	0.992749	0.996142	0.971028	0.955281	0.991718	0.980838
	6.4352	1.01272	0.988724	1.01109	0.93673	1.03773	0.992111	0.986055	0.958206	0.955548	1.03019	1.02214	1.04733	0.973513	1.00974	0.998392	0.916961	0.955602	0.891448	0.92396	1.02079	0.868802	1.04219	1.07666	0.957055	1.01108	0.994308	0.994469	0.993647	1.03477	0.970034	1.00947	0.988702
	8.4364	1.0711	1.01979	0.936845	0.953556	0.994297	1.01543	0.953196	1.00295	1.0002	0.981446	1.02548	1.06419	1.03244	0.923127	0.89304	0.916232	1.02529	0.953892	0.938355	0.966778	0.832958	0.993215	1.01852	0.905375	0.937817	0.959957	0.994677	1.00137	1.01488	0.948048	0.956218	1.01065
	10.4378	0.969813	1.01746	1.07451	0.983903	1.11061	0.957104	0.979857	1.0197	0.964858	0.987421	0.984137	0.940981	1.00086	1.00485	0.92801	0.903737	0.982575	0.888168	1.00127	1.00534	0.889878	0.977945	1.06342	0.945291	0.976787	0.985329	1.03214	0.973492	0.985238	1.03421	0.983622	0.949256
	12.4292	1.14736	1.14951	1.02149	0.977859	0.947429	0.75965	1.11558	0.936016	0.983815	0.912465	0.99442	0.914817	1.07518	0.978192	0.983752	0.917204	0.882059	0.830339	0.874643	0.879292	0.827042	0.934558	0.976445	0.867976	0.899326	1.07199	0.930901	0.890812	0.874401	0.884041	0.976432	0.991176
	14.4308	0.958191	0.807357	1.31798	1.03556	0.643889	0.725196	0.688163	1.51866	0.978591	0.980834	1.20368	1.01424	0.729541	0.788949	0.877405	0.676101	0.852761	0.85297	0.682809	0.974769	0.605037	0.830784	0.71858	0.638756	0.911218	1.988969*	1.11431	0.894172	0.897311	0.889265	1.02103	1.06601
	16.4322	1.00179	1.05841	0.975341	0.918783	0.84813	0.94548	1.05161	0.798636	0.976906	0.951755	1.07637	0.995051	0.702001	0.793897	0.657861	0.553629	0.789116	0.729084	0.552399	1.04652	0.598435	0.7871	0.667145	0.593035	0.846234	1.563846*	0.925482	0.903913	0.897485	0.910562	1.01887	1.0258
	18.4334	0.982293	0.895738	0.984008	0.993936	1.02481	1.05106	1.03434	0.787227	0.987691	0.949778	0.97187	1.00557	0.669332	0.796716	0.626923	0.571909	0.808847	0.714571	0.650811	0.989316	0.502298	0.822037	0.665642	0.591699	0.786399	1.07794	0.955338	0.910295	0.878461	0.807577	0.942391	1.08485
	20.4346	0.896061	0.934242	1.04331	0.940843	0.958635	1.02352	0.8802	0.776289	0.936802	0.869317	0.963049	0.952503	0.687898	0.741013	0.623608	0.535542	0.707932	0.640617	0.561297	0.932562	0.550171	0.83449	0.68691	0.610604	0.790169	1.00803	0.922929	0.81773	0.831365	0.805511	0.968487	1.01071
	22.426	0.991559	0.967642	0.971369	0.971565	0.803552	1.00353	0.969917	0.777963	0.965827	0.920511	1.05064	0.988392	0.667907	0.724679	0.697195	0.555719	0.707999	0.590963	0.560852	0.926703	0.555648	0.798663	0.680668	0.605056	0.825581	0.997637	0.840239	0.830254	0.801148	0.853903	0.9174	1.00811
	24.4276	0.953638	0.909109	0.950929	0.885881	0.78613	0.976683	0.972121	0.736147	0.935791	0.905313	0.986381	0.927872	0.655087	0.723668	0.666147	0.534764	0.788584	0.563605	0.566381	0.90773	0.522934	0.766543	0.606464	0.539095	0.740368	0.931003	0.817834	0.830446	0.840645	0.81814	0.857011	0.968091
	26.429	0.920217	0.919928	0.883542	0.828176	0.828908	0.78172	1.28686	0.749755	0.844756	0.841978	0.931887	0.91339	0.586852	0.673019	0.613664	0.521151	0.737164	0.560714	0.49714	0.767956	0.531687	0.770002	0.621605	0.552554	0.743076	0.983917	0.894167	0.783516	0.830611	0.901894	0.940128	1.03576
	28.4402	0.930125	0.896848	0.90586	0.846372	0.928371	0.909574	0.854786	0.803869	0.94152	0.893832	0.990087	0.874647	0.619711	0.705739	0.670512	0.495237	0.691191	0.624659	0.496282	0.993414	0.52665	0.740501	0.631141	0.56103	0.71807	0.909868	0.836852	0.785579	0.771916	0.846326	0.929518	0.990795
	30.4316	0.901149	0.904061	0.844106	0.787172	0.779177	0.846546	0.919589	0.748237	0.876899	0.837697	0.941596	0.912914	0.688753	0.683021	0.565049	0.524263	0.728195	0.569499	0.551224	0.872735	0.545428	0.747567	0.651888	0.579473	0.743979	0.877737	0.818199	0.809332	0.79732	0.849598	0.896433	0.959593
	32.433	0.88326	0.874101	0.812544	0.863509	0.774433	0.797978	0.840478	0.766973	0.894929	0.902537	0.939769	0.923116	0.642693	0.677595	0.566595	0.51026	0.630203	0.57923	0.434922	0.892077	0.500196	0.710703	0.647958	0.575979	0.757995	0.951483	0.814187	0.826367	0.72743	0.861653	0.884968	0.950968
	34.4346	0.915075	0.867998	0.892715	0.818206	0.827272	0.965475	0.87342	0.682504	0.915276	0.866305	0.97328	0.860059	0.599293	0.674136	0.602063	0.544488	0.737429	0.604808	0.524976	0.872612	0.490611	0.697064	0.611145	0.543256	0.707876	0.817661	0.787978	0.737641	0.743496	0.887083	0.914534	0.914058
	36.4358	0.919681	0.881924	0.852268	0.852417	0.822283	0.881484	0.793436	0.762472	0.906387	0.828756	0.930321	0.912544	0.600765	0.651738	0.611013	0.495528	0.630602	0.58796	0.504544	0.838806	0.495061	0.732248	0.613688	0.545516	0.697842	0.841167	0.80017	0.758419	0.71641	0.808496	0.906087	0.944499
	38.4372	0.843251	0.838593	0.868736	0.797891	0.802734	0.874566	0.854994	0.72118	0.906808	0.79356	0.919829	0.927767	0.609929	0.647907	0.587312	0.519255	0.751846	0.640117	0.488783	0.869211	0.532372	0.748506	0.576701	0.512638	0.713291	0.850398	0.726442	0.763889	0.78543	0.849196	0.875767	0.934606
	40.4284	0.90988	0.857512	0.917849	0.771095	0.851157	0.865088	0.908857	0.681981	0.862829	0.818028	0.895087	0.890821	0.612114	0.67685	0.548088	0.470344	0.719359	0.590518	0.495869	0.843068	0.494083	0.68555	0.647091	0.575209	0.698426	0.861545	0.768074	0.780013	0.763796	0.887313	0.916395	1.01375
	42.41	0.909665	0.874156	0.842012	0.809544	0.816476	0.917045	0.807162	0.697472	0.893918	0.820334	0.911477	0.822955	0.617859	0.657377	0.566264	0.516775	0.689729	0.574671	0.497013	0.852042	0.536968	0.720981	0.652582	0.580089	0.723432	0.837686	0.769272	0.800455	0.768436	0.878817	0.86038	0.978999
	44.4422	0.812507	0.829161	0.890765	0.794401	0.83856	0.943682	0.830537	0.640322	0.856425	0.82678	0.964563	0.872586	0.623462	0.713879	0.591732	0.475643	0.704345	0.607032	0.473022	0.904124	0.528411	0.658964	0.608198	0.540636	0.742917	0.861343	0.732487	0.740136	0.734912	0.843972	0.792348	0.911838
	46.4426	0.865371	0.812073	0.846562	0.755641	0.748831	0.827797	0.833573	0.684597	0.872391	0.84659	0.925936	0.868939	0.6303	0.67403	0.568474	0.485075	0.661893	0.602751	0.545631	0.838396	0.515795	0.729481	0.638885	0.567914	0.765428	0.823209	0.76823	0.801942	0.743844	0.81481	0.909808	0.880827
	48.434	0.910362	0.846693	0.83125	0.734703	0.7638	0.861421	0.831535	0.623627	0.81312	0.806359	0.922074	0.89061	0.584716	0.658388	0.599798	0.477393	0.661428	0.548314	0.490467	0.814302	0.498337	0.68298	0.6453	0.573616	0.739625	0.804899	0.788499	0.764033	0.741524	0.812801	0.892611	0.914565
	50.4354	0.831146	0.836429	0.809438	0.757884	0.815903	0.82157	0.843514	0.723744	0.849222	0.82518	0.892425	0.77158	0.678211	0.659772	0.538034	0.513031	0.635983	0.571779	0.525962	0.844707	0.513056	0.724836	0.609527	0.541817	0.754544	0.747648	0.72738	0.798823	0.806252	0.881171	0.848866	0.915834

## Sheet: Fig 2C
	Time (sec)	Isotonic			Hypotonic			DCPIB
	0	1.02261	1.01093	1.04179	1.03397	1.01255	1.00825	1.02898	1.03972	0.99053
	1	1.0179	1.01533	1.01225	1.01045	1.02302	1.01125	1.01378	1.01338	0.997036
	2	0.990813	1.00306	0.989701	0.999305	1.00011	1.00139	1.004	0.986728	1.01096
	3	0.990469	0.98644	0.972432	0.978738	0.989433	1.00583	0.982646	0.989254	1.00385
	4	0.978205	0.984237	0.983828	0.977542	0.974891	0.973286	0.970597	0.970919	0.997619
	5	0.943629	0.953524	0.932436	1.39422	1.4015	1.46101	1.4472	1.57239	1.54133
	6	0.936914	0.934284	0.936779	1.35646	1.32277	1.41127	1.48406	1.62723	1.61819
	7	0.905566	0.924963	0.901801	1.28813	1.30715	1.40943	1.49848	1.6132	1.62975
	8	0.891935	0.914316	0.901373	1.24433	1.28737	1.37953	1.51059	1.60013	1.61883
	9	0.88629	0.885237	0.902521	1.20357	1.22173	1.32462	1.50239	1.60333	1.60187
	10	0.877092	0.879675	0.870918	1.15896	1.1833	1.30311	1.50573	1.58714	1.60837
	11	0.868228	0.879844	0.858351	1.14695	1.16145	1.24592	1.5088	1.59223	1.58725
	12	0.852755	0.853866	0.841914	1.09639	1.1533	1.22497	1.51557	1.57083	1.55776
	13	0.832448	0.834078	0.824678	1.09314	1.11599	1.18532	1.49898	1.54641	1.51542
	14	0.824578	0.828944	0.807667	1.07226	1.10827	1.17018	1.4924	1.54689	1.50527
	15	0.811922	0.829741	0.803336	1.03202	1.0892	1.16273	1.46138	1.53665	1.48334
	16	0.793201	0.801769	0.80194	1.01057	1.08302	1.13664	1.45594	1.5068	1.45466
	17	0.777269	0.76946	0.791702	0.983581	1.07122	1.14368	1.46332	1.48272	1.46723
	18	0.767488	0.760488	0.802154	0.984107	1.06777	1.13363	1.45539	1.49136	1.45852
	19	0.768863	0.743392	0.768931	0.963662	1.05508	1.10879	1.4444	1.48191	1.44326
	20	0.750687	0.731868	0.76217	0.974604	1.05369	1.11066	1.42429	1.47526	1.42053
	21	0.754765	0.726704	0.753496	0.960663	1.05512	1.09964	1.4256	1.4613	1.40278
	22	0.724277	0.719596	0.735213	0.943135	1.03897	1.07591	1.4287	1.43992	1.38942
	23	0.737763	0.706617	0.739387	0.940156	1.02364	1.07053	1.41986	1.44719	1.35435
	24	0.724554	0.704244	0.731298	0.937715	1.02042	1.05896	1.41839	1.43151	1.34037
	25	0.703502	0.692182	0.733098	0.931119	1.01442	1.06108	1.40615	1.41472	1.35821
	26	0.719816	0.682453	0.72358	0.924321	1.01691	1.05658	1.40345	1.41475	1.37313
	27	0.710971	0.677897	0.701608	0.91808	0.999667	1.05725	1.39302	1.41822	1.37171
	28	0.68607	0.659983	0.687297	0.908596	0.992629	1.03214	1.37288	1.41153	1.34606
	29	0.700006	0.643126	0.700562	0.906935	0.990556	1.01498	1.37215	1.40301	1.33538
