# Supplementary material for: LRRC8A is essential for hypotonicity-, but not for DAMP-induced NLRP3 inflammasome activation
Source: eLife. 2020 Nov 20;9:e59704. doi: 10.7554/eLife.59704 (PMC7679132; doi:10.7554/eLife.59704)
Supplement: Figure 4—source data 1. [file elife-59704-fig4-data1.xlsx]

## Sheet: Fig 4C
	Time (min)	WT Hypotonic				KO Hypotonic
	0	1.05375	1.05168	1.03997	1.03962	1.04285	1.04775	1.04442	1.04349	1.04574
	1	1.02785	1.03084	1.02412	1.01289	1.01685	1.02139	1.01852	1.02082	1.02135
	2	0.997332	1.00463	1.00128	0.997579	1.00102	0.998838	1.00072	0.998927	0.993513
	3	0.975792	0.974424	0.979175	0.983298	0.975705	0.97858	0.977556	0.977395	0.97737
	4	0.945276	0.93843	0.955444	0.96661	0.963572	0.953442	0.958784	0.959366	0.962018
	5	1.3497	1.31953	1.24713	1.26614	1.24315	1.28851	1.24649	1.21521	1.11933
	6	1.30206	1.30169	1.24139	1.25607	1.27238	1.32265	1.24123	1.21219	1.16469
	7	1.25487	1.26814	1.23124	1.21953	1.28943	1.33028	1.24022	1.22301	1.16706
	8	1.22795	1.24636	1.21853	1.20171	1.28219	1.32756	1.24244	1.22612	1.1744
	9	1.19753	1.22144	1.20039	1.18393	1.27795	1.3219	1.23555	1.23014	1.18018
	10	1.15783	1.19969	1.18931	1.16701	1.2561	1.31254	1.24305	1.23658	1.17808
	11	1.14056	1.17691	1.17021	1.15899	1.25524	1.29877	1.2266	1.23039	1.18354
	12	1.11522	1.16807	1.1437	1.1431	1.24537	1.29999	1.21881	1.21784	1.18368
	13	1.08467	1.14346	1.12618	1.13204	1.23221	1.28295	1.21192	1.21392	1.18187
	14	1.05883	1.11679	1.10821	1.11372	1.21533	1.26207	1.20236	1.2164	1.18033
	15	1.04145	1.10228	1.08702	1.10335	1.20598	1.25911	1.19124	1.21155	1.17284
	16	1.0224	1.0803	1.06811	1.08828	1.2086	1.24183	1.18135	1.20412	1.16855
	17	0.999857	1.07485	1.05576	1.07565	1.19208	1.23607	1.17033	1.18992	1.16443
	18	0.988403	1.05796	1.0407	1.06757	1.17964	1.22272	1.16264	1.18059	1.15522
	19	0.974092	1.03992	1.02179	1.05567	1.16937	1.21629	1.15102	1.16758	1.15488
	20	0.960033	1.03428	1.00666	1.03719	1.15558	1.20192	1.13218	1.15826	1.15041
	21	0.947727	1.01926	0.997594	1.03041	1.14801	1.19365	1.12154	1.14653	1.1417
	22	0.9401	0.998377	0.981572	1.02236	1.13524	1.17542	1.12076	1.14493	1.13867
	23	0.925009	0.992511	0.969287	1.01887	1.12371	1.17528	1.11127	1.13135	1.12857
	24	0.90588	0.973463	0.956177	1.01295	1.12212	1.15722	1.09963	1.12245	1.12375
	25	0.896861	0.961778	0.941451	1.00662	1.10244	1.14992	1.08243	1.10477	1.12023
	26	0.889137	0.953771	0.934881	0.999116	1.09486	1.13811	1.07245	1.09626	1.11487
	27	0.881529	0.951376	0.925967	0.987217	1.09178	1.13332	1.06598	1.08578	1.10155
	28	0.873573	0.941592	0.917151	0.978937	1.07818	1.1247	1.05291	1.07557	1.09616
	29	0.869403	0.926124	0.907492	0.972199	1.06798	1.1102	1.04255	1.06601	1.08638
